# Supplementary material for: Molecular mechanism of ligand recognition by membrane transport protein, Mhp1
Source: PubMed Central journal article supplement (PMC4195764; doi:10.15252/embj.201387557), 2014-06-21
Supplement: embj0033-1831-sd1.pdf [file embj0033-1831-sd1.pdf]

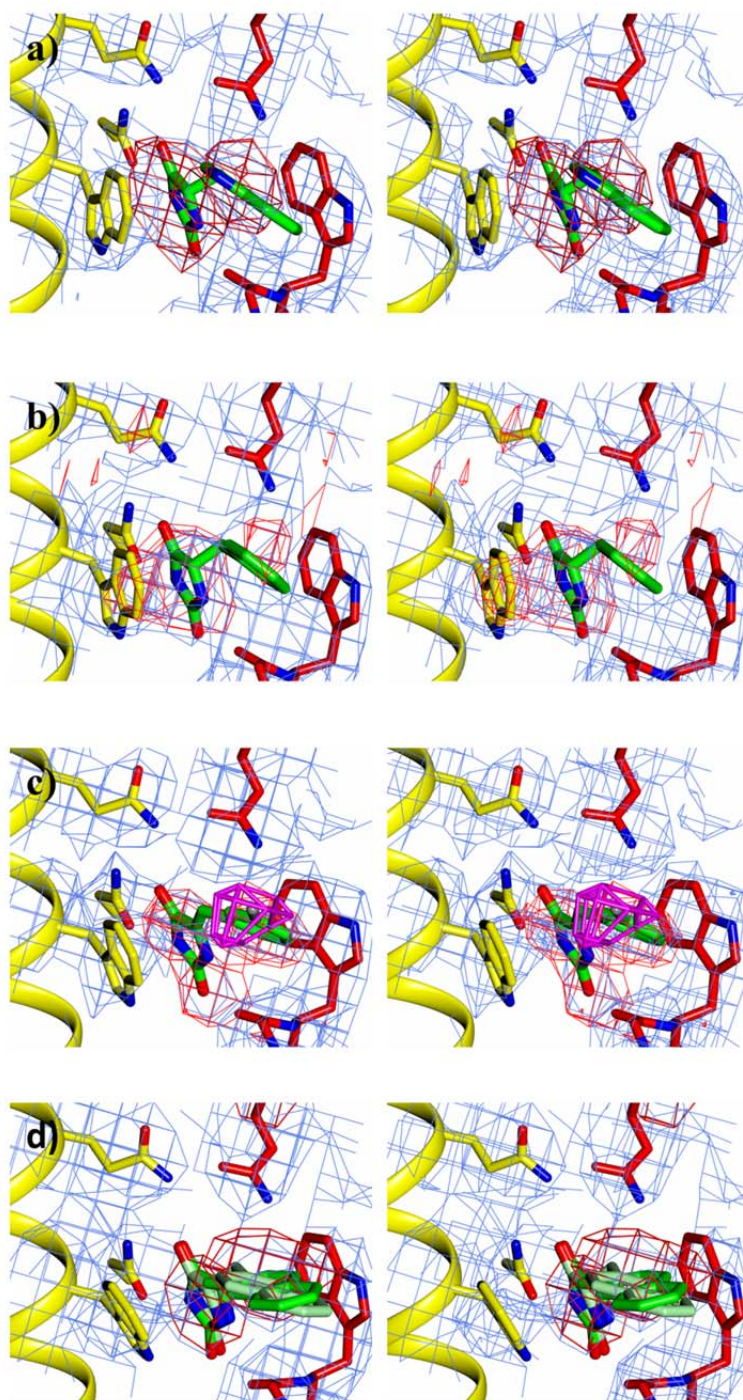

**Figure S1. Electron density for the hydantoin derivatives in the binding site of Mhp1.** (a) Complex with L-IMH. The side chains are coloured as in **Figure 1**. The associated electron density was calculated using phases derived from the model before the ligand was added. The B-factor sharpened 2mFo-DFc density is shown in blue ( $1\sigma$ ) and the mFo-DFc in red ( $3.5\sigma$ ). (b) As (a) for L-BH. The density maps are contoured at 1.5 and  $2.3\sigma$  respectively for the 2mFo-DFc and mFo-DFc. (c) As (a) but for BVH and with an anomalous difference map contoured at  $8.5\sigma$  shown in purple. Good correspondence is seen with the bromine atom. The 2mFo-DFc and mFo-DFc maps are contoured at 1.8 and  $3.6\sigma$  respectively. (d) As (a) for NMH. The L and D forms of the compound are shown in green and light-green respectively. The density maps are contoured at 1.5 and  $3\sigma$  respectively for the 2mFo-DFc and mFo-DFc maps.
