# Supplementary material for: Molecular mechanism of ligand recognition by membrane transport protein, Mhp1
Source: PubMed Central journal article supplement (PMC4195764; doi:10.15252/embj.201387557), 2014-06-21
Supplement: embj0033-1831-sd2.pdf [file embj0033-1831-sd2.pdf]

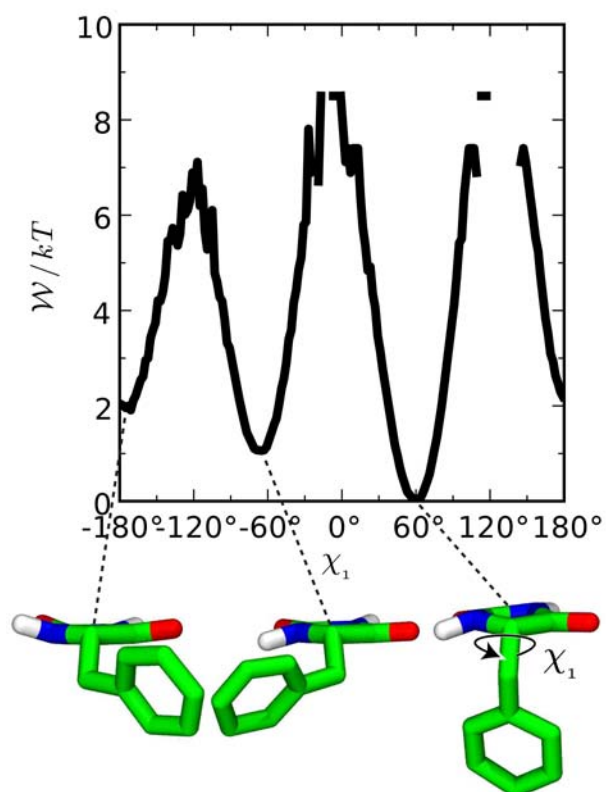

**Figure S2. Free energy landscape of L-BH as a function of dihedral angle  $\chi_1$  alone.** Due to the symmetry of the phenyl ring, the major conformations of L-BH are described by only one torsion  $\chi_1$  and the resulting free energy landscape displays characteristic minima for the *anti* ( $-180^\circ$ ),  $g^-$  ( $-60^\circ$ ) and  $g^+$  ( $+60^\circ$ ) conformer. As the 100-ns equilibrium MD simulation of L-BH in solution contained multiple transitions between these minima (especially  $anti \leftrightarrow g^- \leftrightarrow g^+$ , **Supplementary Fig. 3d**), the barrier for interconversion between conformers is estimated to be  $< 9 kT$  (between  $g^-$  and  $g^+$ , the barrier between  $g^+$  and *anti* is higher but interconversion can proceed through the pathway with the lower barrier).
