# Supplementary material for: Molecular mechanism of ligand recognition by membrane transport protein, Mhp1
Source: PubMed Central journal article supplement (PMC4195764; doi:10.15252/embj.201387557), 2014-06-21
Supplement: embj0033-1831-sd3.pdf [file embj0033-1831-sd3.pdf]

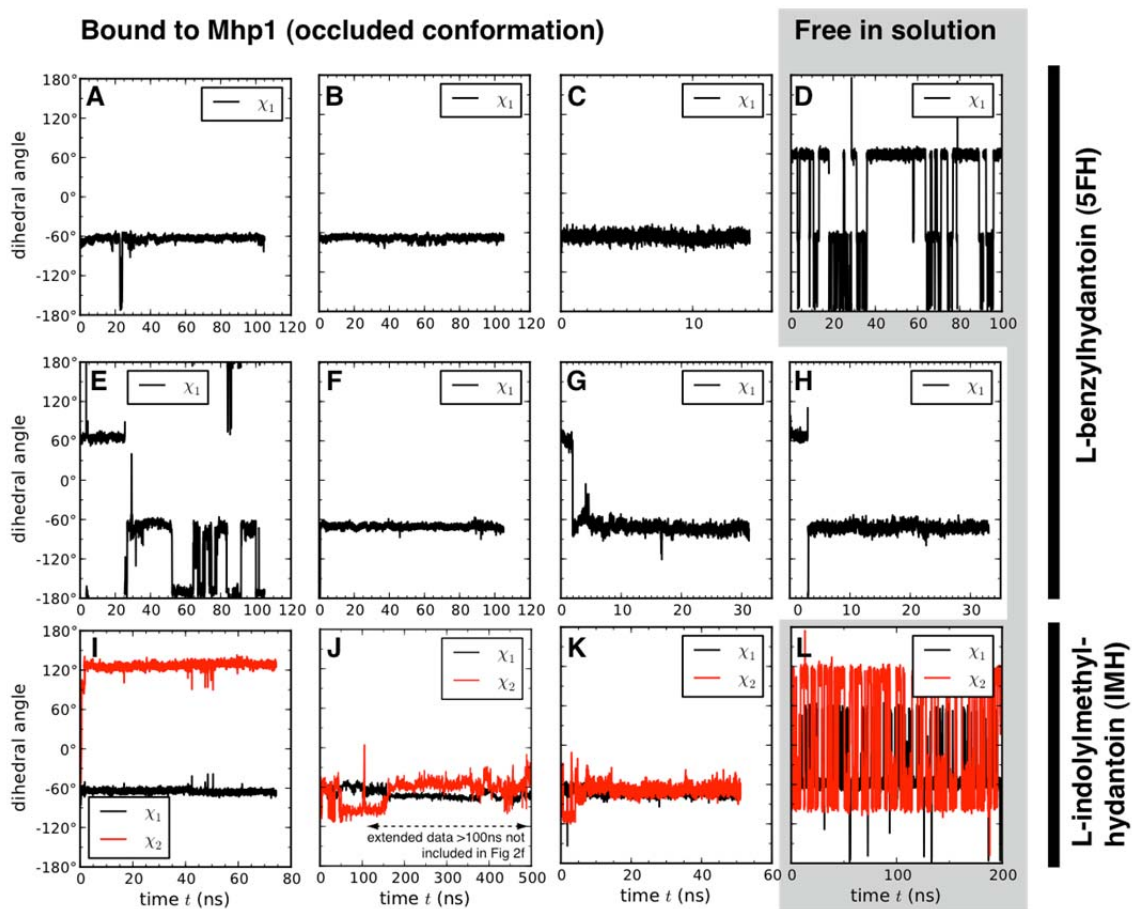

**Figure S3. Time evolution of dihedral angles in L-BH (ligand code 5FH) and L-IMH from MD simulations.** (A-C) Simulations 5FH( $g^-$ ) MD\_001–MD\_003 (L-BH bound to Mhp1, started from the extended conformation as seen for the IMH-bound structure). (D) L-BH in solution. (E-H) Simulations 5FH( $g^+$ ) MD\_001–MD\_004 (L-BH bound to Mhp1, started from the U-shaped folded over conformation as modeled in 2JLO). (I-K) Simulations IMH( $g^-$ ) MD\_001–MD\_003 (L-IMH bound to Mhp1 as seen in the crystal structure). (L) L-IMH in solution. (J) Extended to 500 ns. (L) L-NMH in solution.
