# Supplementary material for: Molecular mechanism of ligand recognition by membrane transport protein, Mhp1
Source: PubMed Central journal article supplement (PMC4195764; doi:10.15252/embj.201387557), 2014-06-21
Supplement: embj0033-1831-sd6.pdf [file embj0033-1831-sd6.pdf]

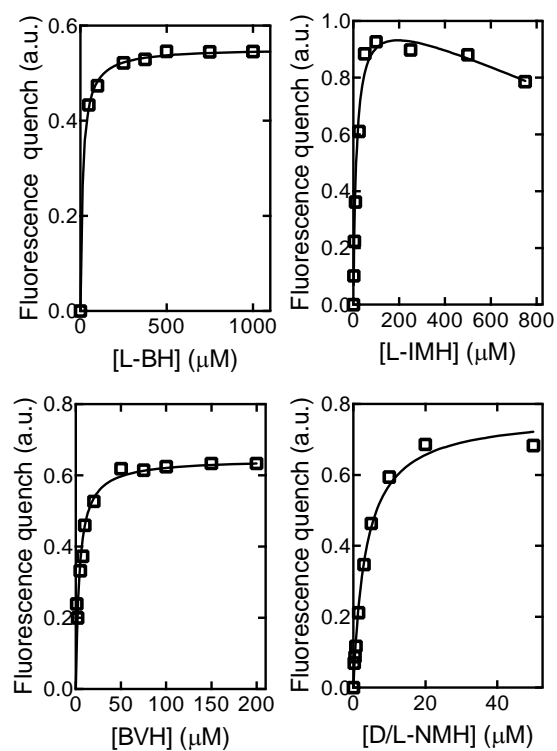

**Figure S6. Stopped-flow fluorimetry titration of Mhp1 with ligands.** Stopped flow measurements were made of the quench in fluorescence of tryptophan residues in wild-type Mhp1 during titration with the indicated example ligands in the presence of 15 mM NaCl as described in **Supplementary Methods**.
