# Supplementary material for: Molecular mechanism of ligand recognition by membrane transport protein, Mhp1
Source: PubMed Central journal article supplement (PMC4195764; doi:10.15252/embj.201387557), 2014-06-21
Supplement: embj0033-1831-sd8.pdf [file embj0033-1831-sd8.pdf]

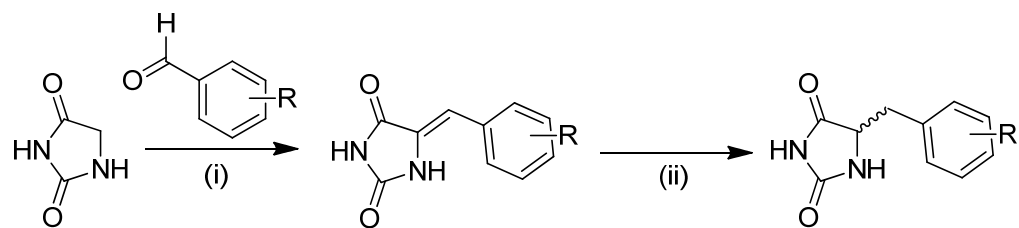

**Figure S8. Synthesis of racemic hydantoin derivatives.** (i) ethanolamine, NaHCO<sub>3</sub>, EtOH, H<sub>2</sub>O, 110 °C, 16 h, 35-76%; (ii) H<sub>2</sub>, Pd/C, EtOH, 16 h, rt, 40-91%.
