# Supplementary material for: Molecular mechanism of ligand recognition by membrane transport protein, Mhp1
Source: PubMed Central journal article supplement (PMC4195764; doi:10.15252/embj.201387557), 2014-06-21
Supplement: embj0033-1831-sd9.pdf [file embj0033-1831-sd9.pdf]

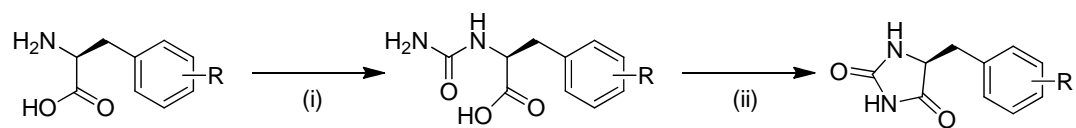

**Figure S9. Synthesis of enantiomerically pure hydantoin derivatives.** (i) KOCN, HCl, H<sub>2</sub>O, 50-70 °C, 0.5-16 h; (ii) HCl, H<sub>2</sub>O, reflux, 0.5-16 h.
